# Supplementary material
Source: PubMed Central journal article supplement (PMC2744345)
Supplement: NIHMS124717-supplement-Table_S1.pdf [file NIHMS124717-supplement-Table_S1.pdf]

**Table S1. Midline genes**

| Name              | Function                         | Name              | Function                         |
|-------------------|----------------------------------|-------------------|----------------------------------|
| <b>MP1</b>        |                                  | <b>All MP3</b>    |                                  |
| <i>5-HT1A</i>     | Serotonin receptor               | <i>5-HT1A</i>     | Serotonin receptor               |
| <i>CG31757</i>    | Phosphodiesterase                | <i>Glu-R1</i>     | Glutamate-gated ion channel      |
| <i>exex</i>       | Lim homeobox transcription       | <i>nub</i>        | POU homeobox transcription       |
| <i>fkf</i>        | Fork head transcription factor   | <i>pdm2</i>       | POU homeobox transcription       |
| <i>Glu-R1</i>     | Glutamate-gated ion channel      | <b>mVUM</b>       |                                  |
| <i>hb</i>         | Zinc finger transcription factor | <i>futsch</i>     | Microtubule binding              |
| <i>Lim3</i>       | Lim homeobox transcription       | <i>CG14509</i>    | Unknown                          |
| <i>nub</i>        | POU homeobox transcription       | <i>CG31757</i>    | Phosphodiesterase                |
| <i>Pdf</i>        | Neuropeptide                     | <i>CG33528</i>    | Monoamine transporter            |
| <i>pdm2</i>       | POU homeobox transcription       | <i>dgk</i>        | Diacylglycerol kinase            |
| <b>H-cell</b>     |                                  | <i>fd59a</i>      | Fork head transcription factor   |
| <i>CG31757</i>    | Phosphodiesterase                | <i>Glu-R1</i>     | Glutamate-gated ion channel      |
| <i>CG33528</i>    | Monoamine transporter            | <i>SNF4a!</i>     | Receptor serine/threonine        |
| <i>DAT</i>        | Dopamine transporter             | <i>Tbh</i>        | Octopamine biosynthesis          |
| <i>Ddc</i>        | Dopamine biosynthesis            | <i>VGlut</i>      | Vesicular glutamate transporter  |
| <i>NPFR1</i>      | Neuropeptide receptor            | <i>zfh1</i>       | Zinc finger transcription factor |
| <i>ple</i>        | Tyrosine 3-monooxygenase         | <b>iVUM</b>       |                                  |
| <i>SNF4a!</i>     | Receptor serine/threonine kinase | <i>CG15236</i>    | Unknown                          |
| <i>SoxN</i>       | HMG transcription factor         | <i>CG8394</i>     | GABA vesicular transporter       |
| <i>tup</i>        | Lim homeobox transcription       | <i>en</i>         | Homeobox transcription factor    |
| <b>H-cell sib</b> |                                  | <i>fkf</i>        | Fork head transcription factor   |
| <i>CG13565</i>    | Unknown                          | <i>Gad1</i>       | Glutamate decarboxylase          |
| <i>fkf</i>        | Fork head transcription factor   | <i>Lim1</i>       | Lim homeobox transcription       |
| <i>Lim1</i>       | Lim homeobox transcription       | <i>per</i>        | PAS transcription factor         |
| <i>per</i>        | PAS transcription factor         | <i>sim</i>        | bHLH-PAS transcription factor    |
| <i>sim</i>        | bHLH-PAS transcription factor    | <b>All VUM4,5</b> |                                  |
| <i>VGlut</i>      | Vesicular glutamate transporter  | <i>cas</i>        | Zinc finger transcription factor |
|                   |                                  | <b>All VUM6</b>   |                                  |
|                   |                                  | <i>Tkr</i>        | BTB/POZ domain                   |
